# Supplementary material
Source: Springer Nature journal article supplement (https://www.springermedizin.de/resource/supplementary/13058_2014_3405_MOESM1_ESM.pdf/9704116)

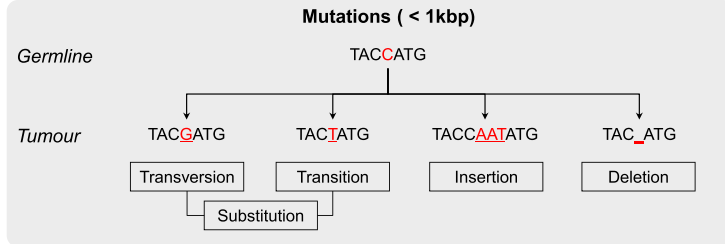

**Structural CNAs (> 1kbp)**

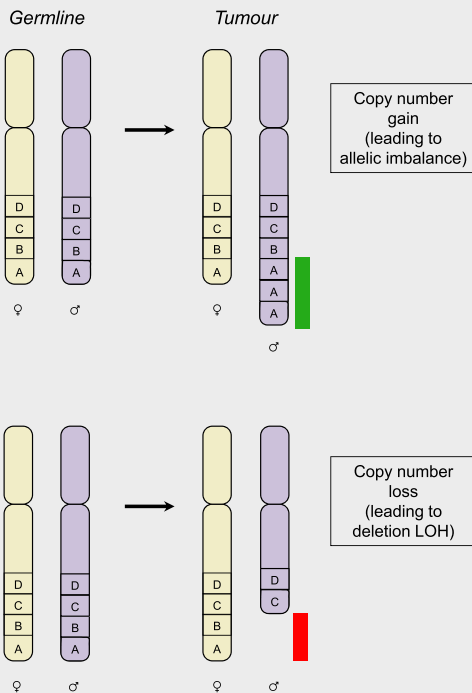

**Structural Rearrangements**

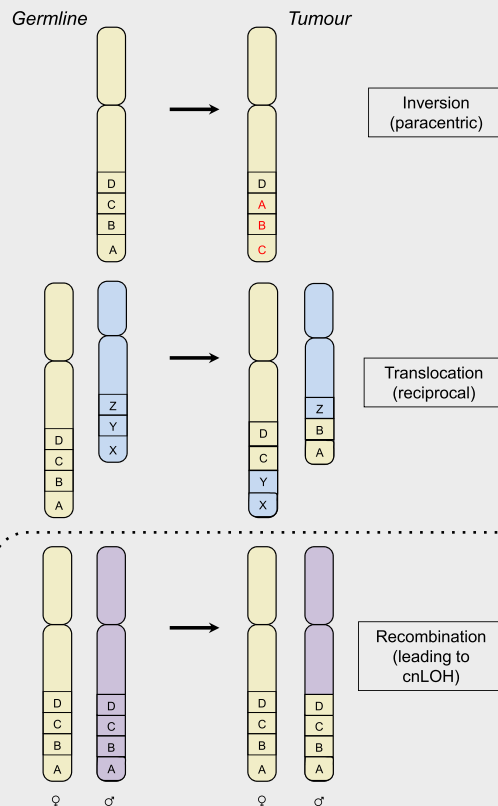

Supplement: MOESM1 [file 9704116]
